# Type specimens in the Vidal Herbarium at the Real Jardín Botánico, Madrid

GRACIELA M. CALABRESE and MAURICIO VELAYOS\*

*Real Jardín Botánico-CSIC, Plaza de Murillo, 2, 28014 Madrid, Spain*

*Received 21 November 2005; accepted for publication 13 February 2008*

Ninety eight type specimens collected by Sebastián Vidal in the Philippines, and kept at the Real Jardín Botánico Herbarium, Madrid (MA), are compiled. Most of these specimens are types of Vidal's names. Only a few are names of other authors (Hoogland, Merrill, and Rolfe). A list of specimens, as well as the *indicatio locotypica* and number in MA, is presented. © 2009 The Linnean Society of London, *Botanical Journal of the Linnean Society*, 2009, 159, 292–299.

ADDITIONAL KEYWORDS: Philippines – Sebastián Vidal – vascular plants.

## INTRODUCTION

One of the tasks of a taxonomist is to revise the type material of the organisms under study. The localization of types is not always easy, because sometimes it is not known where the original specimens are stored. In the 19th century, several expeditions were organized in the Philippines by the Spanish Forestry Commission with the aim of collecting and understanding the regional flora. Some of these specimens were the basis of new species and their types. The Vidal Herbarium at the Real Jardín Botánico, Madrid (MA) has one of the most important collection of plants from the Philippines.

Sebastián Vidal went to the Philippines as the 'Inspector General de Montes' (General Inspector of Forestry) in 1871. From 1876, he was the Chief of the Forestry Commission, and later became the Director of the Manila Botanical Garden (1878–1889). He considered that a herbarium was an essential for reference for future research. In consequence, he emphasized the necessity of collecting, identifying, and keeping dry plants. As a result, ±14 000 specimens were collected during the period 1876–1887 by the 'Comisión de la Flora Forestal de Filipinas'. Vidal also studied and compared the Philippine specimens with types and other material from several major

European herbaria (K, BM, P, MA). He studied his collections firstly at Kew – in cooperation with R. A. Rolfe and J. G. Baker – during 1883, and later at Paris and Madrid. Many new species were described on the basis of these specimens; other names of Vidal were based on specimens collected by Cuming. Duplicates of Vidal's collections are kept at Kew (K, ±4063), Leiden (L, ±2000), G, P, FI, and PNH. The first set of the collection, deposited in Manila, was destroyed by fire in 1897. The second set of Vidal specimens is kept in MA.

## THE HERBARIUM

The specimens of Vidal at MA were filed in three series: Series 1, from N° 1 to N° 2000, published by Vidal (1886); Series 2, from N° 2001 to N° 4062; and a third series, Series M, with most of the specimens unidentified or only identified to the family level. A catalogue with many plants from Series 1 and 2 was published by Cerón (1892). Type specimens are in these series. Figure 1 shows a sheet with a type from Series 1.

Specimens of Series 1 and 2 were also studied by Quisumbing in 1954, 1958 and 1959 during his visits to MA. Quisumbing renumbered Vidal's specimens, giving the same number for specimens of the same species. However, he did not consider that some of these materials had a different date of collection and

\*Corresponding author. E-mail: velayos@rjb.csic.es

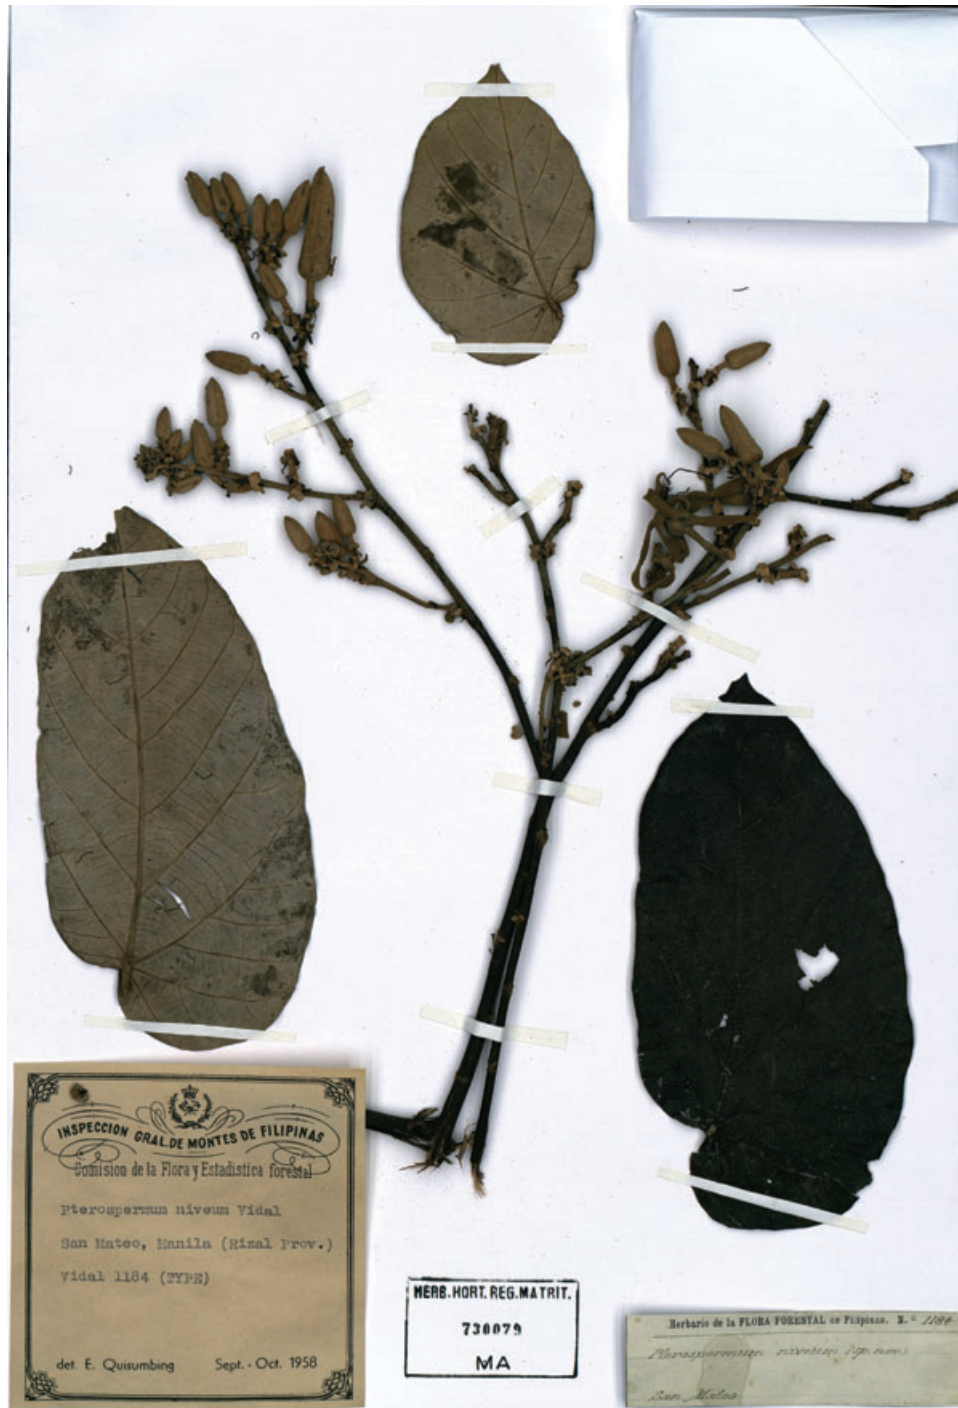

**Figure 1.** Type specimen of *Pterospermum niveum* S. Vidal.

a different locality. This presents additional difficulties in recognizing the original material. Moreover, different labels were used on the sheets. 'Herbario de la FLORA FORESTAL de Filipinas' was printed on some small labels; 'Comisión de la FLORA FORESTAL de Filipinas' was printed on labels attached to

the plants. On other labels, 'Inspección Gral. de Montes de Filipinas / El Jefe de la Com.' was written, and these specimens may have been collected by Vidal.

In this work, we have attempted to compile all the type specimens of the Vidal collection kept at MA.

Most of these types correspond to Vidal's names, but a few are names of Hoogland, Merrill, or Rolfe. A list of the type specimens in the Vidal Herbarium, arranged by family, is given below. For each taxon, we include the following: specific name (the original name published), author, original publication, page, and year of issue; the lectotype is indicated in italics between inverted commas, with comments and the number of the sheet at MA in square brackets. Additional information on type specimens in other herbaria is also given. In most cases, these are syntypes, as usually several collections are mentioned in the protologues. When only a single collection is cited, we indicate 'type' (not holotype) because there may be duplicates in other herbaria. When there is doubt about the authenticity of the type (although we believe that the material is original), it is indicated by a query (?) and we write 'type?'. No attempt has been made to decide whether particular specimens are holotypes, isotypes or syntypes. Lectotypification from the syntypes should be performed in a revision by taxonomists with a knowledge of the group involved. When lectotypes have already been selected, they are quoted with references.

Some of Vidal's names are described only on Cuming's specimens (kept in K with some duplicates in MO): *Artabotrys cumingianus*, *Lucinaea cumingiana*, *Nauclea blancoi*, *Nauclea gracilis*, *Uncaria florida*, *Villaria littoralis* and *Wrightia candollei*. Finally, other names based on Vidal's specimens without sheets at MA are: *Berchemia philippinensis* S.Vidal, *Gonocaryum tarlacense* S.Vidal, *Gordonia acuminata* S.Vidal, *Linocieria coriaceae* S.Vidal, *Litsea albayana* S.Vidal, *Medinilla lagunae* S.Vidal, *Pittosporum fernandezii* S.Vidal ex Fern.–Vill., *Quercus companoana* S.Vidal, *Quercus fernandezii* S.Vidal, *Rhododendron quadrasianum* S.Vidal, *Talauma angatensis* (Blanco) Fern.–Vill., and *Xanthophytum villarii* S.Vidal.

#### TYPE SPECIMENS IN VIDAL HERBARIUM

##### Annonaceae

***Artabotrys rolfei*** S.Vidal, Revis. pl. vasc. filip.: 39 (1886).

'[Vidal] 8 Pr. Bataan [syntype, MA 396941]; [Vidal] 9 Pr. Zambales y Manila [syntype, MA 719547]; [Vidal] 1101 Distr. Benguet [syntype, MA 397784]. – Cum. [Cuming] 1099 Pr. Albay; [Cuming] 1495 Pr. Batangas; [Cuming] 1818 I. Bohol.'

***Orophea cumingiana*** S.Vidal, Phan. Cuming. philipp.: 170 (1885).

'Cum. [Cuming] 854 [Prov. Albay]; [Cuming] 1412 Prov. Albay. – Herb. prop. [Vidal] 944 Calawan, Prov. Laguna, Luzon [syntypes, MA 397837, MA 397838; types? MA 397802, 397803].'

Lectotype in L designated by Kessler (1988: 51) on Cuming 854.

***Orophea enterocarpoidea*** S.Vidal, Phan. Cuming. philipp.: 171 (1885).

'Cum. [Cuming] 1586 Prov. Batangas. – Herb. prop. [Vidal] 1107 Laguimanoc, Prov. Tayabas, Luzon [syntype, MA 396773].'

Lectotype in G designated by Kessler (1988: 42) on Cuming 1586. Isolectotypes BM and P. The specimen Vidal 1107, cited in the protologue, must be referred to *O. cumingiana* (cf. Kessler, 1988: 51).

***Polyalthia lanceolata*** S.Vidal, Phan. Cuming. philipp.: 170 (1885).

'Cum. [Cuming] 450. – Herb. prop. [Vidal] 954 S. Mateo, Prov. Manila [syntype, MA 397832].'

***Saccopetalum longipes*** S.Vidal, Revis. pl. vasc. filip.: 43 (1886).

'[Vidal] 15 Bagac, Pr. Bataan [syntype, MA 396921; type?, MA 396920]; [Vidal] 628 [Guinayangan, Pr. Tayabas]; [Vidal] 1104 Guinayangan, Pr. Tayabas (N. v. Lanutan) [syntype, MA 397783].'

***Xylopi blancoi*** S.Vidal, Sin. gen. pl. leños. Filip.: 12, Lám. V Fig. C (1883).

The *indicatio locotypica* is 'La Paz (Tarlac)'. In Vidal (1886: 43), the locality is completed with the collector number: '[Vidal] 949 La Paz, Pr. Tarlac (N. v. Banitan) [types, MA 728468, MA 397789, MA 397817].'

##### Apocynaceae

***Alyxia monilifera*** S.Vidal, Revis. pl. vasc. filip.: 182 (1886).

'[Vidal] 461 Monte Banahao, Pr. Tayabas [isolectotype, MA 400892].'

Lectotype in K, designated by Middleton (2000: 41).

##### Araliaceae

***Heptapleurum caudatum*** S.Vidal, Phan. Cuming. philipp.: 175 (1885).

'Cum. [Cuming] 800 Prov. Tayabas. – Herb. prop. [Vidal] 793 Tivi, Prov. Albay [syntype, MA 728011].'

##### Berberidaceae

***Berberis barandana*** S.Vidal, Revis. pl. vasc. filip.: 45 (1886).

'[Vidal] 1911 Distr. Lepanto [type, MA 728006].'

##### Bombacaceae [= Malvaceae]

***Cumingia philippinensis*** S.Vidal, Phan. Cuming. philipp.: 212 (1885).

'Herb. prop. [Vidal] 653, 1170 Unisan Prov. Tayabas (N. v. Libato puti) [syntype, MA 729045] – Castilla Prov. Albay.'

##### Boraginaceae

***Cordia blancoi*** S.Vidal, Revis. pl. vasc. filip.: 192 (1886).

‘[Vidal] 475 *La Paz, Pr. Tarlac* [syntypes, MA 720769, MA 720770, MA 720771]; [Vidal] 837 *Unisan, Pr. Tayabas (N. v. Anong)*. – *Cum.* [Cuming] 1202 *Pr. Albay*’.

***Cordia cumingiana*** S.Vidal, Phan. Cuming. philipp.: 187 (1885).

‘*Cum.* [Cuming] 1012 *Prov. Albay ó Pangasinan?* – *Herb. prop.* [Vidal] 1647 *Prov. Abra* [syntypes, MA 720788, MA 720789]; [Vidal] 1653 *San Mateo, Prov. Manila* (syntype, MA 720790)’.

***Ehretia navesii*** S.Vidal, Revis. pl. vasc. filip.: 194 (1886).

‘[Vidal] 471 *Pr. Bataan* [syntypes, MA 720759, MA 720758]; [Vidal] 473 *San Mateo, Pr. Manila* [syntype, MA 720751]’.

#### Buxaceae

***Buxus rolfiei*** S.Vidal, Revis. pl. vasc. filip.: 233 (1886).

‘[Vidal] 1033 *Angat, Pr. Bulacan (N. v. Pincabanao)* [type, MA 728470]’.

#### Capparaceae

***Capparis sepiaria*** L. var. ***acuta*** S.Vidal, Revis. pl. vasc. filip.: 47 (1886).

‘[Vidal] 24 *Sipocot, Pr. Camarines Sur* [type, MA 728007]’.

#### Compositae [Asteraceae]

***Centratherum fruticosum*** S.Vidal, Revis. pl. vasc. filip.: 159 (1886).

‘[Vidal] 1502 *Distr. Lepanto* [type, MA 728008]’.

***Gynura purpurascens*** S.Vidal, Revis. pl. vasc. filip.: 164 (1886).

‘[Vidal] 1510 *Distr. Lepanto* [syntype, MA 728012]. – [Vidal] 1499 *Distr. Benguet parece identico; pero los ejemplares son muy imperfectos para decidirlo* [paratypes, MA 728013, MA 728014, MA 728015]’.

***Lactuca luzonica*** S.Vidal, Revis. pl. vasc. filip.: 165 (1886).

‘[Vidal] 1505 *Distr. Bontoc* [syntype, MA 728009]; [Vidal] 1509, 1511 *Distr. Lepanto*. – *Cum.* [Cuming] 1642 *I. Panay*’.

***Vernonia arborea*** Ham. var. ***vestita*** S.Vidal, Revis. pl. vasc. filip.: 160 (1886).

‘[Vidal] 410 *Antipolo, Distr. Morong (N. v. Malasambon)* [syntype, MA 728010] – *Cum.* [Cuming] 495 *Pr. Albay*. – *Lobb Luzon*’.

#### Celastraceae

***Caryospermum philippinense*** S.Vidal, Revis. pl. vasc. filip.: 89 (1886).

‘[Vidal] 1770 *Distr. Lepanto* [type, MA 474811]’.

***Kurrimia gracilis*** S.Vidal, Revis. pl. vasc. filip.: 89 (1886).

‘[Vidal] 1122 *San Mateo, Pr. Manila* [types, MA 472747, MA 472748]’.

***Kurrimia luzonica*** S.Vidal, Revis. pl. vasc. filip.: 88 (1886).

‘[Vidal] 1053 *Laguimanoc, Pr. Tayabas*. —; [Vidal] 231 *Pr. Tayabas, con flores monstruosas parece pertenecer a esta especie; sus hojas son, sin embargo, menores y más oblongas y los pedicelos de las pocas flores deformes más largos y bracteolados* [paratype, MA 472774]’.

#### Clusiaceae

***Calophyllum vidalii*** Cerón, Catal. pl. herb.: 229 (1892).

‘*Hab. Sylvas montis Isarog insulae Luzonis*’.

In Cerón (1892: 22), the name ‘*C. cuneatum* Vidal (nueva especie)’ is referred to the specimen Vidal 2134. It is obviously a *nomen nudum*. Some pages later is the Latin diagnosis of *Calophyllum* [*Calophyllum*] *vidalii* referred to *C. cuneatum* but without specimen citation (Cerón 1892: 229). So, the herbarium specimen MA 395079 (Original label: ‘Comisión de la FLORA FORESTAL de Filipinas/ N° 2134./ *Calophyllum cuneatum* (n. sp.)/ Mte. Isarog. Pr. Cam. Sur.’ should be the type collection.

#### Connaraceae

***Ellipanthus luzoniensis*** S.Vidal, Revis. pl. vasc. filip.: 104 (1886).

‘[Vidal] 236 [syntypes, MA 402858, MA 722457; type? MA 396248], [Vidal] 1241 *Bosoboso, Distr. Morong* [syntype, MA 396280; type? MA 396279]’.

#### Convolvulaceae

***Erycibe sericea*** Hoogl., *Blumea* 7(2): 317 (1953).

‘Vidal 3361, holotype i K. Malamaui Island (*Philippines*) [MA 732219, isotype]’.

#### Cunoniaceae

***Weinmannia luzoniensis*** S.Vidal, Revis. pl. vasc. filip.: 125 (1886).

‘[Vidal] 314 *Lucban, Pr. Tayabas* [lectotype, MA 752112, isolectotype MA 752098]; [Vidal] 2002 *Distr. Benguet*’.

Lectotype designated by Hopkins (1998), *Adansonia* ser.3, vol 20:58–62.

#### Dilleniaceae

***Wormia luzoniensis*** S.Vidal, Revis. pl. vasc. filip.: 36 (1886).

‘[Vidal] 3 *Pr. Zambales* [type, MA 728004]’.

#### Dipterocarpaceae

***Dipterocarpus velutinus*** S.Vidal, Revis. pl. vasc. filip.: 59 (1886).

‘[Vidal] 80 *Angat*, Pr. *Bulacan* [syntype, MA 728005; type?, MA 396885]; [Vidal] 81 *Bosoboso*, Distr. *Morong* [syntype, MA 397115; type?, MA 396856].’

***Shorea contorta*** S.Vidal, Sin. gen. pl. leños. Filip.: 15, Lám. XV Fig. E (1883).

The *indicatio locotypica* is ‘*Bosoboso (Morong)*’. In Vidal (1886: 61), the locality is completed with the collector number: ‘[Vidal] 987 *San Isidro de Bosoboso*, Distr. *Morong* [types?, MA 397118, MA 397117, MA 397138].’

***Shorea polita*** S.Vidal, Sin. gen. pl. leños. Filip.: 15, Lám. XV Fig. D (1883).

The *indicatio locotypica* is ‘*Bongabon (Nueva Écija)*’. In Vidal (1886: 61), the locality is completed with the collector number: ‘[Vidal] 989 *Bongabon*, Pr. *Nueva Écija* [types?, MA 396875, MA 728721, MA 396850, MA 396832].’

#### *Euphorbiaceae*

***Agrostistachys maesoana*** S.Vidal, Revis. pl. vasc. filip.: 242 (1886).

‘[Vidal] 897 *Guinayangan*, Pr. *Tayabas* (N. v. *Puso puso*) [syntypes, MA 728469, MA 398033]; *Talisay*, I. *Ticao* (N. v. *Cacao-cacao*) [syntype, MA 398051]; *Puerto Princesa*, I. *Paragua* (N. v. *Malacapé*).’

***Cleistanthus blancoi*** S.Vidal, Revis. pl. vasc. filip.: 234 (1886).

‘[Vidal] 559 *Moriones*, Pr. *Tarlac* [lectotype, MA 727999; isolectotypes, MA 728000, MA 397072, MA 397071].’

Lectotype designated by Dressler (1999: 139).

***Cleistanthus cupreus*** S.Vidal, Revis. pl. vasc. filip.: 235 (1886).

‘[Vidal] 560 *Bosoboso*, Distr. *Morong* [lectotype, MA 728001; isolectotypes MA 728002, MA 397055, MA 397098, MA 397070]; [Vidal] 588 *San Mateo*, Pr. *Manila* [syntype, MA 728003].’

Lectotype designated by Dressler (1999: 129).

***Phyllanthus gigantifolius*** S.Vidal, Revis. pl. vasc. filip.: 236 (1886).

‘[Vidal] 1734 [Distr. *Morong*] [= *Phyllanthaceae*], [Vidal] 1743 Distr. *Morong* [syntype, MA 397506].’

#### *Ericaceae*

***Gaultheria cumingiana*** S.Vidal, Phan. Cuming. philipp.: 184 (1885).

‘Cum. [Cuming] 934 *Prov. Albay*. – *Herb. prop.* [Vidal] 818 *Volcan Mayon*, *Prov. Albay*; [Vidal] 1829 Distr. *Lepanto* [syntypes, MA 728722, MA 474377].’

***Rhododendron rosmarinifolium*** S.Vidal, Revis. pl. vasc. filip.: 172 (1886).

‘[Vidal] 1530 Distr. *Bontoc* (N. v. *Vicbiqui*) [type, MA 474372].’

***Rhododendron verticillatum*** S.Vidal, Revis. pl. vasc. filip.: 171 (1886).

‘[Vidal] 1529 Distr. *Bontoc*, 1000–1200 m alt (N. v. *Lofong*) [type, MA 474369].’

***Vaccinium barandanum*** S.Vidal, Revis. pl. vasc. filip.: 169 (1886).

‘[Vidal] 1532 Distr. *Lepanto* (N. v. *Lusong*) [type, MA 474368].’

***Vaccinium benguetense*** S.Vidal, Revis. pl. vasc. filip.: 168 (1886).

‘[Vidal] 1515 [Distr. *Benguet*. Syntypes MA 728724, MA 474367]; [Vidal] 1534 Distr. *Benguet* [syntypes, MA 728723, MA 474365].’

***Vaccinium cumingianum*** S.Vidal, Revis. pl. vasc. filip.: 167 (1886).

‘[Vidal] 413 *Monte Banahao*, 2000 m alt, Pr. *Tayabas* [syntype, MA 474363] – *Cum* [Cuming] 805 Pr. *Tayabas*.’

***Vaccinium indutum*** S.Vidal, Revis. pl. vasc. filip.: 169 (1886).

‘[Vidal] 1831 Distr. *Bontoc* (N. v. *Banuay*) [type, MA 474362].’

***Vaccinium luzoniense*** S.Vidal, Revis. pl. vasc. filip.: 168 (1886).

‘[Vidal] 1535 Distr. *Lepanto* [type, MA 474360, MA 474361].’

***Vaccinium villarii*** S.Vidal, Revis. pl. vasc. filip.: 166 (1886).

‘[Vidal] 414 *Monte banahao*, 2000 m alt, Pr. *Tayabas* [syntype, MA 474359]; [Vidal] 817 *Volcán Mayon*, Pr. *Albay*; [Vidal] 1533 Distr. *Lepanto* [syntype, MA 474356]. – *Cum* [Cuming] 935 Pr. *Albay*.’

#### *Fagaceae*

***Quercus castellarnauiana*** S.Vidal, Revis. pl. vasc. filip.: 264 (1886).

‘[Vidal] 1806 *Santa Cruz*, I. *Marinduque* (N. v. *Puso-puso*) [types, MA 396218, MA 396219].’

***Quercus soleriana*** S.Vidal, Revis. pl. vasc. filip.: 261 (1886).

‘[Vidal] 612 *Abucay*, Pr. *Bataan*; [Vidal] 623 *San Mateo*, Pr. *Manila* (N. v. *Cacaná*); [Vidal] 1807 *Antipolo*, Distr. *Morong* [syntype, MA 728863]; [Vidal] 1810 Pr. *Abra*.’

#### *Flacourtiaceae* [= *Salicaceae*]

***Homalium barandae*** S.Vidal Cat. met. pl. leños.: 32 (1880).

The *indicatio locotypica* is just the title of the publication ‘*Catálogo metódico de las plantas leñosas silvestres y cultivadas observadas en la provincia de Manila*’. In Vidal (1886: 141), as well as in the original label, the locality is completed with the collector number: ‘[Vidal] 355 *San Mateo*, Pr. *Manila* (type, MA 728869).’

***Homalium villarianum*** S.Vidal, Revis. pl. vasc. filip.: 142 (1886).

‘[Vidal] 791 *Paracale*, Pr. Camarines Norte [syntype, MA 728867]; [Vidal] 1371 *Centro Luzon* [syntype, MA 728868]’.

#### Gentianaceae

**Crawfordia luzoniensis** S.Vidal, Revis. pl. vasc. filip.: 191 (1886).

‘[Vidal] 1228 *Distr. Lepanto* [type, MA 728865]’.

#### Hydrangeaceae

**Deutzia pulchra** S.Vidal, Revis. pl. vasc. filip.: 124 (1886).

‘[Vidal] 1361 Pr. Abra; [Vidal] 1362 *Distr. Lepanto* [syntype, MA 729649]; [Vidal] 2019 *Distr. Benguet* (*N. v. Quet-quet*)’.

#### Lauraceae

**Beilschmiedia cairocan** S.Vidal, Revis. pl. vasc. filip.: 223 (1886).

‘[Vidal] 519 *Morong*, Pr. Bataan (*N. v. Cairocan*) [type, MA 397180]’.

**Cinnamomum mercadoi** S.Vidal, Revis. pl. vasc. filip.: 224 (1886).

‘[Vidal] 521 *San Mateo*, Pr. Manila (*N. v. Calingay* . . .) [type, MA 396030]’.

**Cryptocarya ilocana** S.Vidal, Revis. pl. vasc. filip.: 223 (1886).

‘[Vidal] 1684 Pr. Ilocos Norte (*N. v. Camigay*) [type, MA 397175; type?, MA 395818]’.

**Cryptocarya luzoniensis** S.Vidal, Revis. pl. vasc. filip.: 222 (1886).

‘[Vidal] 1680 *Cardona*, *Distr. Morong* [syntypes, MA 397147, MA 395807]; [Vidal] 1686 *Monte Arayat*, Pr. Pampanga [syntypes, MA 397146, MA 395820, MA 395811]’.

**Cryptocarya villarii** S.Vidal, Revis. pl. vasc. filip.: 222 (1886).

‘[Vidal] 520 *Angat*, Pr. Bulacan [type, MA 396024]’.

**Litsea garciae** S.Vidal, Revis. pl. vasc. filip.: 228 (1886).

‘[Vidal] 861 *Goa*, Pr. Camarines Sur (*N. v. Pipi*) [type, MA 395121]’.

**Litsea perrottetii** F.Vill. var. *parviflora* S.Vidal, Revis. pl. vasc. filip.: 225 (1886).

‘[Vidal] 525 Pr. Tayabas [type?, MA 396041]’.

**Litsea perrottetii** F.Vill. var. *villarii* S.Vidal, Revis. pl. vasc. filip.: 225 (1886).

‘[Vidal] 534 Pr. Tayabas [type, MA 395136, MA 474961]’.

**Litsea verticillata** S.Vidal [nom. illeg.], Revis. pl. vasc. filip.: 226 (1886).

‘[Vidal] 1688 *I. Marinduque* [syntype, MA 395816; types? MA 395815, MA 395809, MA 395821, MA 395810]; [Vidal] 1689 *Bosoboso*, *Distr. Morong* [syntype, MA 395825; types? MA 395824]’.

*Leguminosae, Caesalpinoideae [=Fabaceae]*

**Gleditschia** [*Gleditsia*] **rolfei** S.Vidal, Revis. pl. vasc. filip.: 115 (1886).

‘[Vidal] 1826 Pr. Nueva Ecija [types, MA 396707, MA 396687]’.

#### Lythraceae

**Lagerstroemia batitanan** S.Vidal, Revis. pl. vasc. filip.: 139 (1886).

‘[Vidal] 356bis *San Antonio*, Pr. Laguna [syntype, MA 729241]; [Vidal] 784 *Unisan*, Pr. Tayabas [syntype, MA 729242]’.

#### Melastomataceae

**Astronia calycina** S.Vidal, Revis. pl. vasc. filip.: 136 (1886).

‘[Vidal] 781 [780] *Monte Bulusan*, Pr. Albay (*N. v. Tunan-tunan*) [type, MA 398729]’.

The number Vidal 781 of the protologue is a mistake. The herbarium specimen, as pointed out by Cerón (1892: 84), says Vidal 780.

**Astronia cumingiana** S.Vidal, Phan. Cuming. philipp.: 174 (1885).

‘*Cum.* [Cuming] 999 *Prov. Albay*. – *Herb. prop.* [Vidal] 343 [type ?, MA 398720], [Vidal] 344 *Prov. Manila* [syntype, MA 398735]; [Vidal] 1387 *Distr. Lepanto, Luzon* [syntype, MA 398328]’.

**Astronia pulchra** S.Vidal, Revis. pl. vasc. filip.: 136 (1886).

‘[Vidal] 345 *Monte Iriga*, Pr. Camarines Sur (*N. v. Dita-dita*) [type, MA 398709]’.

**Astronia rolfei** S.Vidal, Phan. Cuming. philipp.: 174 (1885).

‘*Cum.* [Cuming] 1723. – *Herb. prop.* [Vidal] 1392 *Tivi, Prov. Albay*. (*N. v. Tognao-tognao*) [syntype, MA 398326]’.

**Carionia triplinervia** Rolfe, Journ. Linn. Soc. 21: 310 (1886).

‘*Luzon, Volvano Mayon, Prov. Albay, 5100 ft. alt.; S. Vidal n. 779!* [isotype, MA 732218]’.

#### Meliaceae

**Beddomea luzoniensis** S.Vidal, Revis. pl. vasc. filip.: 84 (1886).

‘[Vidal] 169 *Mauban*, Pr. Tayabas (*N. v. Malacamote*) [type, MA 397758; type ?, MA 397733]’.

**Dysoxylum blancoi** S.Vidal, Cat. met. pl. leños.: 22 (1880).

The *indicatio locotypica* is ‘*Montes de San Mateo*’. In Vidal (1886: 81), as well as in the original label, the locality is completed with the collector number: ‘[Vidal] 165 *Manila* [type, MA 729239]’.

#### Menispermaceae

**Pycnarrhena manillensis** S.Vidal, Revis. pl. vasc. filip.: 45 (1886).

[Vidal] 1778 *Alrededores de Manila (San Juan del Monte)* [type, MA 729192]’.

#### Myrtaceae

**Decaspermum blancoi** S.Vidal, Phan. Cuming. philipp.: 172 (1885).

‘Cum. [Cuming] 801 *Prov. Tayabas. – Herb. prop.* [Vidal] 322 *Angat, Prov. Bulacan* [syntype, MA 729191; type? MA 396657]’.

**Eugenia cinnamomea** S.Vidal, Phan. Cuming. philipp.: 173 (1885).

‘Cum. [Cuming] 846 *Prov. Albay. – Herb. prop.* [Vidal] 329, *San Mateo, Prov. Manila* [syntype, MA 396070]’.

**Eugenia cumingiana** S.Vidal, Phan. Cuming. philipp.: 173 (1885).

‘Cum. [Cuming] 925 *Prov. Albay. – Herb. prop.* [Vidal] 325 *Bosoboso, Distrito Morong* [syntype, MA 396063]; [Vidal] 1410 *Infanta, Prov. Zambales, Luzon (N. v. Malapaitan)* [syntype, MA 396010; type? MA 396009]’.

**Rhodamnia glabra** S.Vidal, Revis. pl. vasc. filip.: 129 (1886).

‘[Vidal] 782 *Guinayangan, Pr. Tayabas (N. v. Guisguis; en el partido de Sorsogon, Pr. Albay: Gás-gas* [type, MA 729193]’.

**Syzygium rolfei** Merr. in Philip. Journ. Sci. 79(4): 412 (1950).

‘Panay, León, Vidal 2768 [isotype, MA 396613]’.

#### Moraceae

**Taxotrophis ilicifolia** S.Vidal, Revis. pl. vasc. filip.: 249 (1886).

‘[Vidal] 904 *Guinayangan, Pr. Tayabas (N. v. Cuyos cuyos)* [syntype, MA 729237]; [Vidal] 905 [Libmanan, Pr. Camarines Sur]; [Vidal] 1783 *Libmanan, Pr. Camarines Sur*; [Vidal] 1794 [I. Marinduque. Syntype, MA 729238], [Vidal] 1795 *I. Marinduque*’.

#### Oleaceae

**Jasminum luzoniense** S.Vidal, Phan. Cuming. philipp.: 185 (1885).

‘Cum. [Cuming] 1029 *Prov. Albay. – Herb. prop.* [Vidal] 455 *Pr. Zambales* [syntype, MA 729298]; [Vidal] 1575 *Distr. Lepanto* [syntype, MA 729293]; [Vidal] 1576 *Distr. Lepanto (N. v. Singitan)* [syntype, MA 729290]’.

**Linociera cumingiana** S.Vidal, Phan. Cuming. philipp.: 185 (1885).

‘Cum. [Cuming] 972 *Prov. Albay. – Herb. prop.* [Vidal] 1573 [in original label: Pr. Ilocos Norte. Syntype, MA 729289]’.

#### Rhamnaceae

**Ventilago luzoniensis** S.Vidal, Revis. pl. vasc. filip.: 90 (1886).

‘[Vidal] 198 *La Paz, Tarlac* [type, MA 472763]’.

#### Rosaceae

**Eriobotrya philippinensis** S.Vidal, Revis. pl. vasc. filip.: 123 (1886).

‘[Vidal] 1350 *Santa Cruz, Pr. Zambales* [syntype, MA 729287]; [Vidal] 1353 *Infanta, id.* [syntype, MA 729288]’.

**Rubus rolfei** S.Vidal, Phan. Cuming. philipp.: 171 (1885).

‘Cum. [Cuming] 808 *Prov. Tayabas. – Herb. prop.* [Vidal] 294 *en la cumbre del monte. Banahao de Lucban, Prov. Tayabas, 1800 m altitud* [syntypes, MA 729284, MA 729285]’.

#### Rubiaceae

**Adina philippinensis** S.Vidal, Revis. pl. vasc. filip.: 148 (1886).

‘[Vidal] 371 *San Mateo, Pr. Manila* [type, MA 729493]’.

**Canthium villarii** S.Vidal, Phan. Cuming. philipp.: 182 (1885).

‘Cum. [Cuming] 886 *Prov. Albay*; [Cuming] 1527 *Prov. Batangas? – Herb. prop.* [Vidal] 398 *Laguimanoc, Pr. Tayabas* [syntype, MA 729494]’.

**Gardenia longiflora** S.Vidal, Revis. pl. vasc. filip.: 153 (1886).

‘[Vidal] 832 *Paracale, Pr. Camarines Norte* [type, MA 729647]’.

**Nauclea cumingiana** S.Vidal, Phan. Cuming. philipp.: 176 (1885).

‘Cum. [Cuming] 833 *Prov. Tayabas*; [Cuming] 1522 *Prov. Batangas. – Herb. prop.* [Vidal] 365 *Centro de Luzon* [syntype, MA 729495]; [Vidal] 367 *Isla de Samar* [syntype, MA 729496]’.

**Pavetta parviflora** S.Vidal, Phan. Cuming. philipp.: 183 (1885).

‘Cum. [Cuming] 1394 *Prov. Albay? – Herb. prop.* [Vidal] 380 [original label: Quingua. Syntype, MA 729497]’.

**Randia cumingiana** S.Vidal, Phan. Cuming. philipp.: 179 (1885).

‘Cum. [Cuming] 1366 *Prov. Albay. – Herb. prop.* [Vidal] 39 *Manila*; [Vidal] 388 *Calauan, Pr. Laguna* [syntypes, MA 729499, MA 729498]’.

**Uncaria hookeri** S.Vidal, Phan. Cuming. philipp.: 177 (1885).

‘Cum. [Cuming] 619, 1128 *Prov. Albay. – Herb. prop.* [Vidal] 1469 *Pr. Bulacan* [syntype, MA 729500]’.

**Webera cumingiana** S.Vidal, Phan. Cuming. philipp.: 178 (1885).

‘Cum. [Cuming] 865 *Pr. Albay. – Herb. prop.* [Vidal] 373 *Pr. Manila* [syntype, MA 729501]’.

**Webera luzoniensis** S.Vidal, Phan. Cuming. philipp.: 179 (1885).

‘Cum. [Cuming] 1323 *Prov. Albay. – Herb. prop.* [Vidal] 1451 *Prov. Manila* [syntype, MA 729502]’.

*Sapindaceae*

***Sapindus tureznaninowii*** S.Vidal, Sin. gen. pl. leños. Filip.: 21, Lám. XXXIV Fig. A (1883).

The *indicatio locotypica* is ‘*Jardín Botánico de Manila (común en los montes del Centro de Luzón)*’. In Vidal (1886: 96), the locality is completed with the collector number: ‘[Vidal] 218 [Manila. Type?, MA 729448-1]; [Vidal] 1225 *Manila (N. v. Tiquis-tiquis)* [type?, MA 729648-2]’.

*Sterculiaceae [= Malvaceae]*

***Heritiera sylvatica*** S.Vidal, Revis. pl. vasc. filip.: 66 (1886).

‘[Vidal] 103 *Umigan, Pr. Nueva Ecija* [syntype, MA 475028; type?, MA 475027]; [Vidal] 105 *Lobó, Pr. Batangas. (N. v. Dungon)* [syntype, MA 475075]’.

***Pterospermum niveum*** S.Vidal, Revis. pl. vasc. filip.: 67 (1886).

‘[Vidal] 98bis *Pr. Bataan* [syntype, MA 730080]; [Vidal] 1184 [San Mateo, Manila. Syntype, MA 730079]; [Vidal] 1185 *San Mateo, Manila* (syntype, MA 730077; type?, MA730078); [Vidal] 1189 *Distr. Lepanto* [syntype, MA 730075; type?, MA 730076]. – *Cum* [Cuming] 1163 *Pr. Albay?*’.

*Symplocaceae*

***Symplocos montana*** S.Vidal, Revis. pl. vasc. filip.: 179 (1886).

‘[Vidal] 67 [Monte Banahao, 2000 m alt., Pr. Tayabas. Syntype, MA 729650]; [Vidal] 982 *Monte Banahao, 2000 m alt., Pr. Tayabas*’.

***Symplocos pseudo-spicata*** S.Vidal, Revis. pl. vasc. filip.: 179 (1886).

‘[Vidal] 448 *San Mateo, Pr. Manila* [type, MA 729651]’.

***Symplocos villari*** S.Vidal, Revis. pl. vasc. filip.: 178 (1886).

‘[Vidal] 446 *Angat, Pr. Bulacan* [syntype, MA 729646]; [Vidal] 828 *Sipocot, Pr. Camarines Sur* [syntype, MA 729645]; [Vidal] 1581 *Pr. Ilocos Norte* [syntype, MA 729644]’.

*Theaceae*

***Gordonia luzonica*** S.Vidal, Revis. pl. vasc. filip.: 57 (1886).

‘[Vidal] 63 *Monte Banahao, 600–1000 m altitud, Pr. Tayabas* [types, MA 730073; MA 730074]’.

*Urticaceae*

***Boehmeria weddeliana*** S.Vidal, Revis. pl. vasc. filip.: 256 (1886).

‘[Vidal] 1784 *Distr. Bontoc (N. v. Ngaluy)* [type, MA 472930]’.

*Verbenaceae*

***Callicarpa micrantha*** S.Vidal, Phan. Cuming. philipp.: 187 (1885).

‘*Cum.* [Cuming] 1165 *Prov. Albay. – Herb. prop.* [Vidal] 1641, *Prov. Abra* [syntype, MA 72847]’.

***Clerodendron navesianum*** S.Vidal, Cat. met. pl. leños.: 39 (1880).

The *indicatio locotypica* is ‘*Montes de San Mateo y cultivada en algunos jardines*’. In Vidal (1886: 210–211), as well as in the original label, the locality is completed with the collector number: ‘[Vidal] 490 *San Mateo, Pr. Manila* [type, MA 730072]’.

## ACKNOWLEDGEMENTS

The authors are indebted to the reviewers for their comments on the manuscript.

## REFERENCES

- Cerón S. 1892.** *Catálogo de las plantas del herbario recolectado por el personal de la suprimida Comisión de la Flora Forestal.* Manila: Inspección General de Montes.
- Dressler S. 1999.** Revision of the genus *Cleistanthus* (Euphorbiaceae) in the Philippines. *Blumea* **44**: 109–148.
- Hopkins HCF. 1998.** A revision of *Weinmannia* (Cunoniaceae) in Malesia and the Pacific. 2. Sulawesi and the Philippines. *Adansonia* **20**: 43–66.
- Kessler PJA. 1988.** Revision der Gattung *Orophea* Blume (Annonaceae). *Blumea* **33**: 1–80.
- Middleton DJ. 2000.** Revision of *Alyxia* (Apocynaceae). Part 1: Asia and Malesia. *Blumea* **45**: 1–146.
- Vidal S. 1886.** *Revisión de plantas vasculares filipinas.* Manila.
